# Supplementary material
Source: PubMed Central journal article supplement (PMC3692583)
Supplement: NIHMS442767-supplement-S_Fig_1__2__Table_1.pdf [file NIHMS442767-supplement-S_Fig_1__2__Table_1.pdf]

## Supporting Information

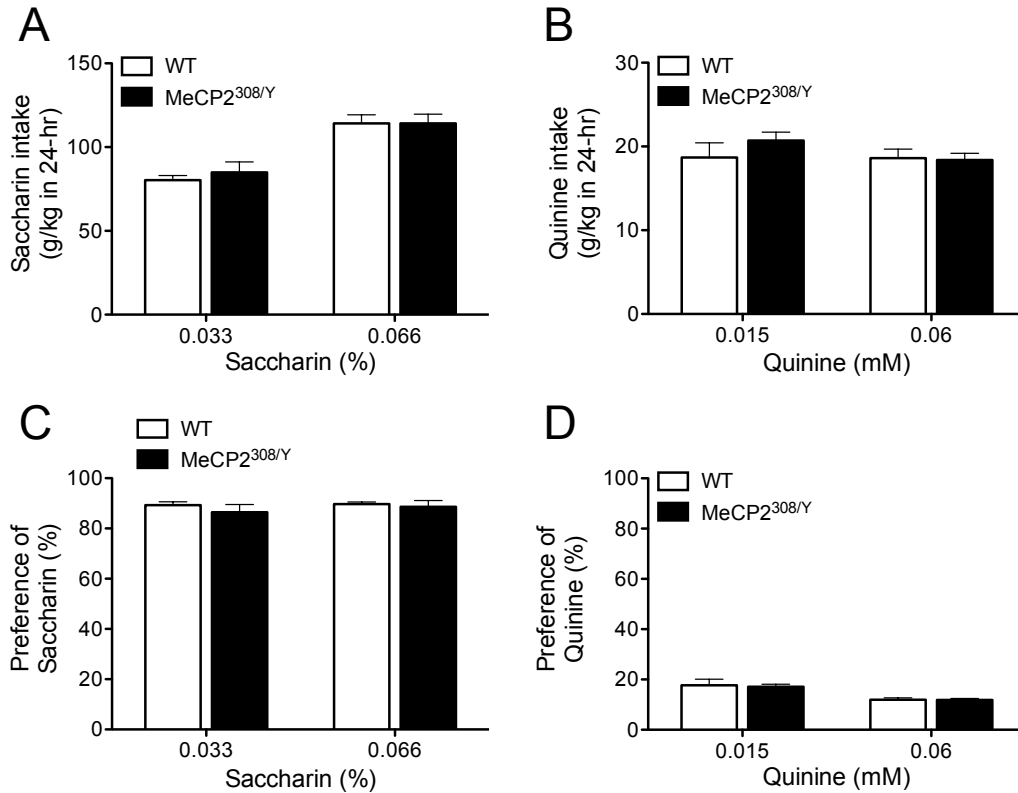

**Supplemental Figure 1.** Saccharin and quinine intake by MeCP2<sup>308/Y</sup> and WT mice. The MeCP2<sup>308/Y</sup> mutation did not impact taste function as indicated by equal consumption of saccharin and quinine solutions as WT mice. **A)** Intake of 0.033 and 0.066% solutions of saccharin and **B)** quinine solutions of 0.015 and 0.06mM. **C)** Preference for saccharin and **D)** quinine at the same concentration in A, B. Levels of intake and preference of saccharin and quinine are in keeping with previous results with C57BL/6J mice (Lim et al., 2012).

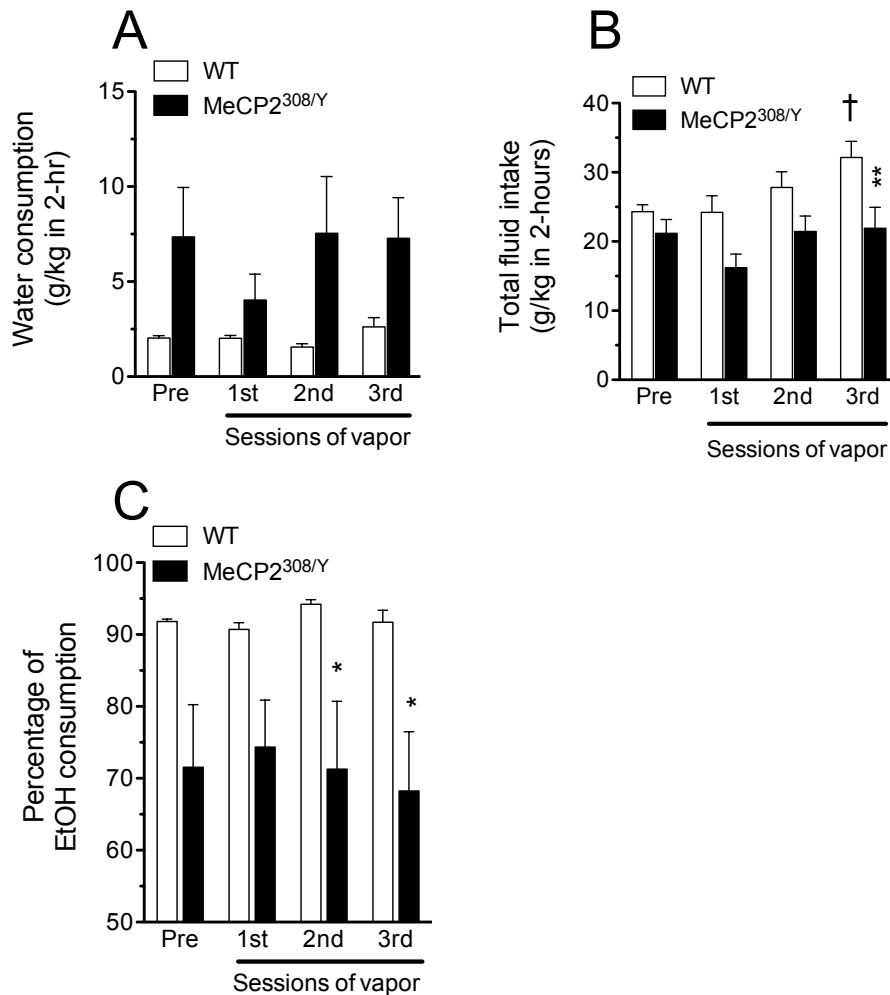

**Supplemental Figure 2.** Water intake and alcohol preference in the course of the CIE experiment shown in Fig. 4B. **A**) Overall, water intake was higher in MeCP2<sup>308/Y</sup> mice compared to WT mice (significant main effect of genotype:  $F_{1,48}=6.465$ ,  $p=0.0217$ ). **B**) An increase of total fluid intake in WT mice was observed over the 3 vapor bouts (significant main effect of genotype:  $F_{1,48}=15.39$ ,  $p=0.001$ ; session:  $F_{3,48}=3.76$ ,  $p=0.017$ ; by RM two-way ANOVA). Bonferroni post-hoc tests confirmed a significant increased drinking of WT mice ( $\dagger p<0.05$ ) vs. baseline (Pre) and vs. MeCP2<sup>308/Y</sup> ( $** p<0.01$ ). **C**) Preference for alcohol was higher in WT compared to MeCP2<sup>308/Y</sup> mice (significant main effect of genotype:  $F_{1,48}=7.437$ ,  $p=0.0149$ ; with a significant difference ( $p<0.05$ ) between WT and MeCP2<sup>308/Y</sup> after the 2nd and 3rd post vapor session).

## Supplemental Table 1. GSEA results

| genes      | sign.<br>EtOHvsSAL | tscore<br>Mecp2KOvsWT | pvalue<br>Mecp2KOvsWT | Core<br>Enrichment |
|------------|--------------------|-----------------------|-----------------------|--------------------|
| Pmvk       | UP                 | 15.87618907           | 0.00054333            | YES                |
| Adipor2    | UP                 | 11.73368377           | 0.00133023            | YES                |
| Idh2       | UP                 | 11.70182799           | 0.001340936           | YES                |
| Mt1        | UP                 | 8.948381539           | 0.002944752           | YES                |
| Heph       | UP                 | 8.474458416           | 0.003449706           | YES                |
| Fkbp5      | UP                 | 5.791292563           | 0.010242052           | YES                |
| Rhou       | UP                 | 4.461637305           | 0.020966991           | YES                |
| Msra       | UP                 | 3.996037895           | 0.02808119            | YES                |
| Sin3b      | UP                 | 3.886093854           | 0.030200084           | YES                |
| Mobp       | UP                 | 3.635198851           | 0.035862315           | YES                |
| Sdc4       | UP                 | 3.44474331            | 0.041093668           | YES                |
| Rab26      | UP                 | 2.971262246           | 0.059008401           | YES                |
| Mkrn1      | UP                 | 2.906343711           | 0.062180902           | YES                |
| Ddc        | UP                 | 2.905318502           | 0.062232694           | YES                |
| Tcfcp2l1   | UP                 | 2.571347103           | 0.082396594           | YES                |
| Osmr       | UP                 | 2.505519619           | 0.087281124           | YES                |
| Tpd52l2    | UP                 | 2.061749488           | 0.131275555           | YES                |
| Mt2        | UP                 | 1.996018168           | 0.139864818           | YES                |
| Mertk      | UP                 | 1.926243651           | 0.149717006           | YES                |
| Gpt2       | UP                 | 1.689624479           | 0.1896812             | YES                |
| Igfbp4     | UP                 | 1.655829969           | 0.196332496           | YES                |
| Nfkbia     | UP                 | 1.581658047           | 0.211871919           | YES                |
| Ctla2a     | UP                 | 1.555214941           | 0.21774054            | YES                |
| Farp2      | UP                 | 1.16869115            | 0.326948742           | NO                 |
| Slc37a4    | UP                 | 1.019954179           | 0.382833276           | NO                 |
| Rps6       | UP                 | 0.706852282           | 0.530615234           | NO                 |
| S100a6     | UP                 | 0.618691423           | 0.579921019           | NO                 |
| A730017C20 |                    |                       |                       |                    |
| Rik        | UP                 | 0.618249385           | 0.580176627           | NO                 |
| Timp4      | UP                 | 0.578277656           | 0.603629282           | NO                 |
| Slc2a1     | UP                 | 0.566022564           | 0.610952615           | NO                 |
| Bok        | UP                 | 0.120693758           | 0.911563347           | NO                 |
| Map1lc3b   | UP                 | -0.192018599          | 0.859990042           | NO                 |
| Blnk       | UP                 | -0.22236135           | 0.838310822           | NO                 |
| Thrsp      | UP                 | -0.34481197           | 0.752993794           | NO                 |
| Rin1       | UP                 | -0.355519543          | 0.745728657           | NO                 |
| Icam4      | UP                 | -0.426896758          | 0.698237943           | NO                 |
| Ptplb      | UP                 | -0.585806535          | 0.599160923           | NO                 |

|          |      |              |             |     |
|----------|------|--------------|-------------|-----|
| Dkk3     | UP   | -0.696112372 | 0.536441959 | NO  |
| Fdft1    | UP   | -1.047606053 | 0.37178199  | NO  |
| Ube2j2   | UP   | -1.830633807 | 0.164565787 | NO  |
| Tpd52l1  | UP   | -2.027812234 | 0.135629793 | NO  |
| Pkp2     | UP   | -2.509584277 | 0.086969387 | NO  |
| Pdk3     | UP   | -5.519959306 | 0.011710935 | NO  |
| Mat2a    | UP   | -5.858899118 | 0.009914091 | NO  |
| Fzd6     | DOWN | -8.070932158 | 0.003973783 | YES |
| Cd160    | DOWN | -7.694648989 | 0.004561511 | YES |
| Pvr13    | DOWN | -6.862049871 | 0.006336712 | YES |
| Itm2a    | DOWN | -5.91841373  | 0.009636689 | YES |
| Ugp2     | DOWN | -5.801632441 | 0.010190981 | YES |
| Rsb1     | DOWN | -4.058687019 | 0.026958974 | YES |
| P2ry12   | DOWN | -3.589020369 | 0.037048802 | YES |
| Fgfr1    | DOWN | -3.529180162 | 0.038661921 | YES |
| Idh1     | DOWN | -3.133397807 | 0.051928505 | YES |
| Crtap    | DOWN | -2.523382426 | 0.085921284 | YES |
| Bmpr1a   | DOWN | -1.063384591 | 0.365614364 | NO  |
| Gabra2   | DOWN | -1.02205402  | 0.381983138 | NO  |
| Nfia     | DOWN | -0.86819862  | 0.449163455 | NO  |
| AA408251 | DOWN | -0.772365089 | 0.496165639 | NO  |
| Ephb1    | DOWN | -0.076870493 | 0.943566172 | NO  |
| Mpeg1    | DOWN | 0.164187963  | 0.880021815 | NO  |
| BC035044 | DOWN | 1.309372943  | 0.28166294  | NO  |
| Akap8    | DOWN | 1.585519499  | 0.21102976  | NO  |
| Fgfr2    | DOWN | 1.712879289  | 0.185252671 | NO  |
| Ttf2     | DOWN | 1.776474216  | 0.173731987 | NO  |

### **Supplemental literature cited**

Lim JP, Zou ME, Janak PH, Messing RO (2012) Responses to ethanol in C57BL/6 versus C57BL/6 x 129 hybrid mice. *Brain and behavior* 2:22-31.
